# Supplementary material for: Characterization by SEM, TEM and Quantum-Chemical Simulations of the Spherical Carbon with Nitrogen (SCN) Active Carbon Produced by Thermal Decomposition of Poly(vinylpyridine-divinylbenzene) Copolymer
Source: MDPI journal article supplement (doi:10.3390/ma2031239), 2009-09-07
Supplement: s1 [file s1]

# Characterization by SEM, TEM and Quantum-Chemical Simulations of the Spherical Carbon with Nitrogen (SCN) Active Carbon Produced by Thermal Decomposition of Poly(vinylpyridine-divinylbenzene) Copolymer

Volodymyr D. Khavryuchenko<sup>1</sup>, Oleksiy V. Khavryuchenko<sup>2,\*</sup>, Andriy I. Shkilnyy<sup>2,†</sup>,  
Denys A. Stratiichuk<sup>3</sup> and Vladyslav V. Lisnyak<sup>2,\*</sup>

<sup>1</sup> Institute for Sorption and Problems of Endoecology, National Academy of Sciences of Ukraine / 13 General Naumov str., UA-03167, Kyiv, Ukraine; E-Mail: vkhavr@rumbler.ru

<sup>2</sup> Chemical Department, Kyiv Taras Shevchenko National University / 64 Volodymyrska str., UA-01033, Kyiv, Ukraine; E-Mail: andriy.shkilnyy@gmail.com

<sup>3</sup> Institute for Superhard Materials, National Academy of Science of Ukraine / 2 Avtozavodska str., UA-04074, Kyiv, Ukraine; E-Mail: strat1@yandex.ru

<sup>†</sup> Present address: Université de Tours, UFR de Sciences Pharmaceutiques / 37200 Tours, France

\* Authors to whom correspondence should be addressed; E-Mails: alexk@univ.kiev.ua (O.V.K.); lisnyak@univ.kiev.ua (V.V.L.); Tel. +38-044-258-1241; Fax: +38-044-258-1241

## Description of Supplementary Materials

Supplementary materials includes \*.xyz files with the Cartesian coordinates of the cluster, optimized in <sup>1</sup>S RHF, basic units and supercell Cartesian coordinates of the models and the protocols of the computation \*.out.

The name of the file consists of the system *NAME* (number of cluster – *C* or model *M*) and an addition, revealing the carbonization stage. The files like *NAMEX.\** (where *X* = 0 – 12) or *NAMEY.\** (where *Y* = 0 – 18) correspond to the number of the system.
